# Supplementary material for: Simple Detection and Culture of Circulating Tumor Cells from Colorectal Cancer Patients Using Poly(2-Methoxyethyl Acrylate)-Coated Plates
Source: MDPI journal article supplement (doi:10.3390/ijms24043949), 2023-02-16
Supplement: s1 [file s1]

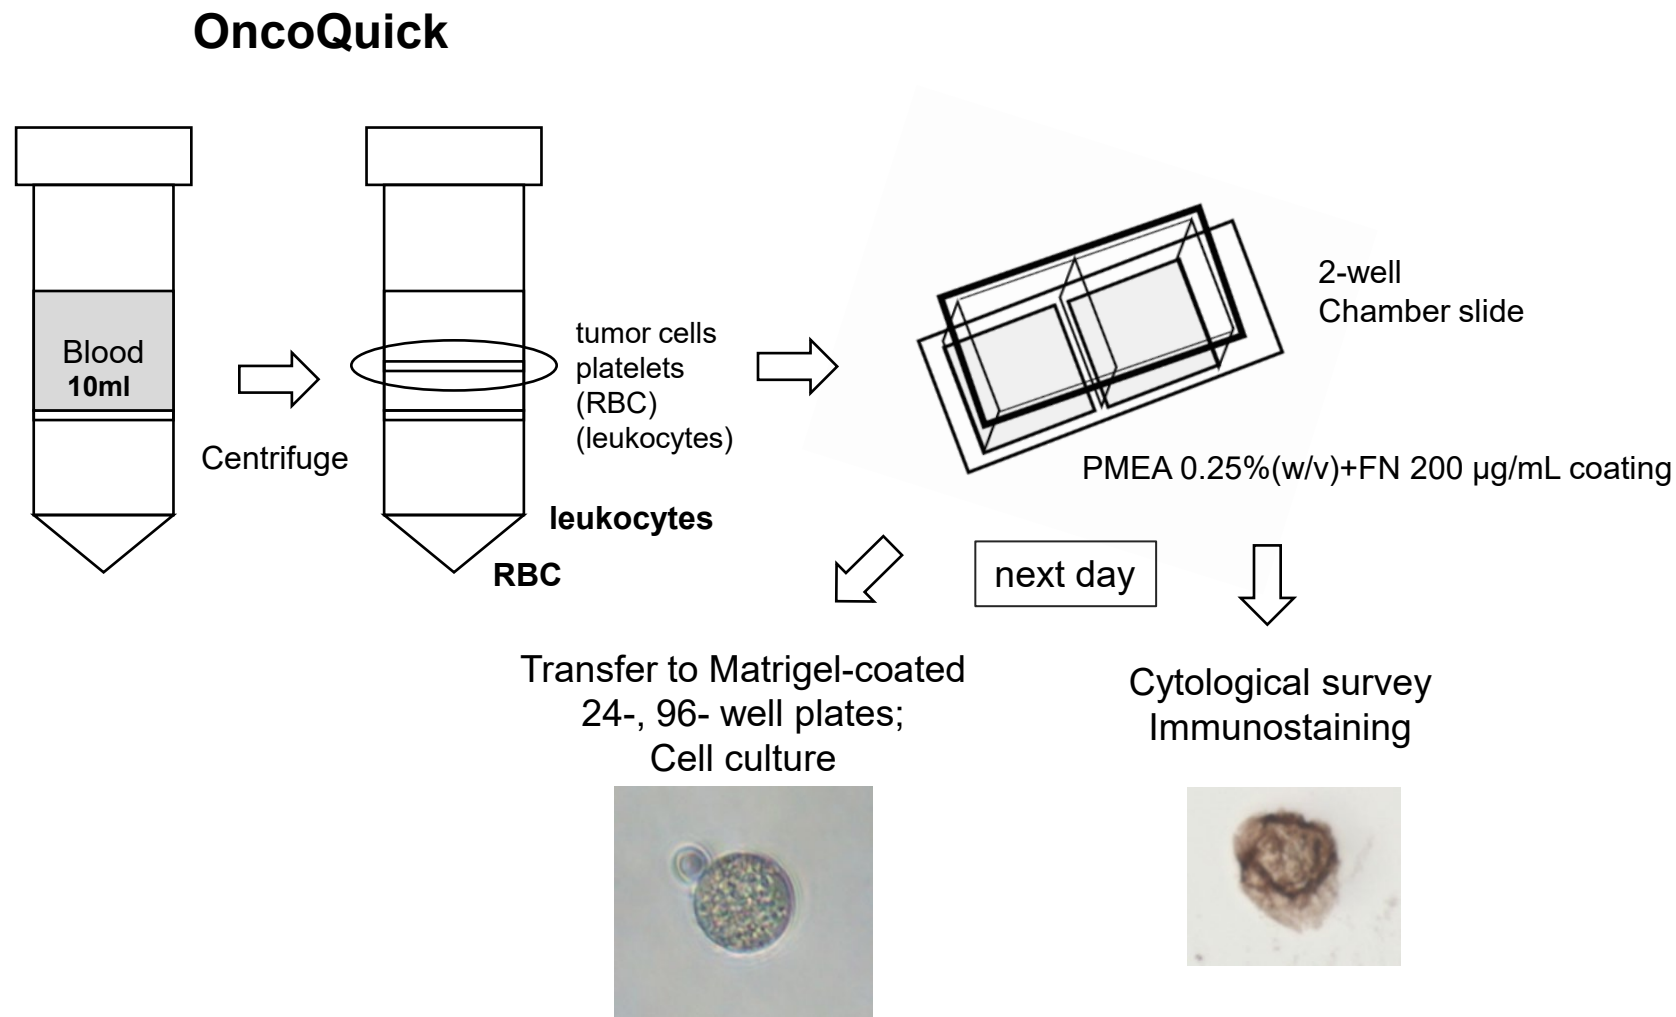

**Fig. S1. Scheme of CTC collection and analysis.** OncoQuick tube and PMEAFN were used for enrichment of CTCs. Cells were incubated overnight on the PMEAFN-coated slides. The next day, more than half fraction was transferred to Matrigel-coated plates. The remaining cells were subject to immunostaining for EpCAM. FN: fibronectin.

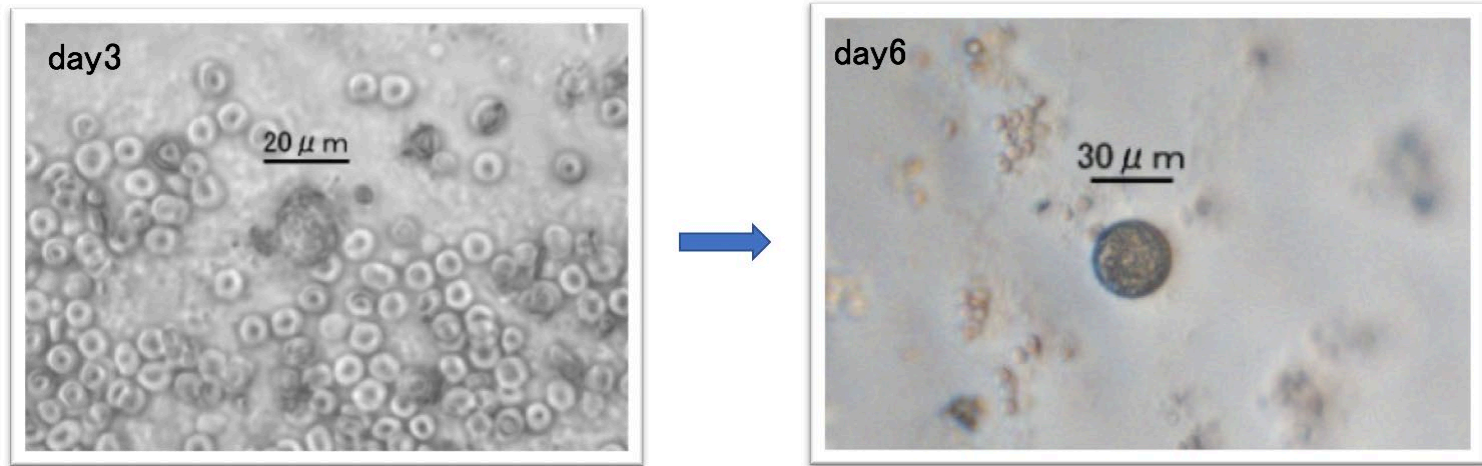

**Fig. S2. Culture of CTC in Case #33.** A spheroid-like structure grew up from day 3 to day 6 while many red blood cells and some leukocytes disappeared during the period.

A

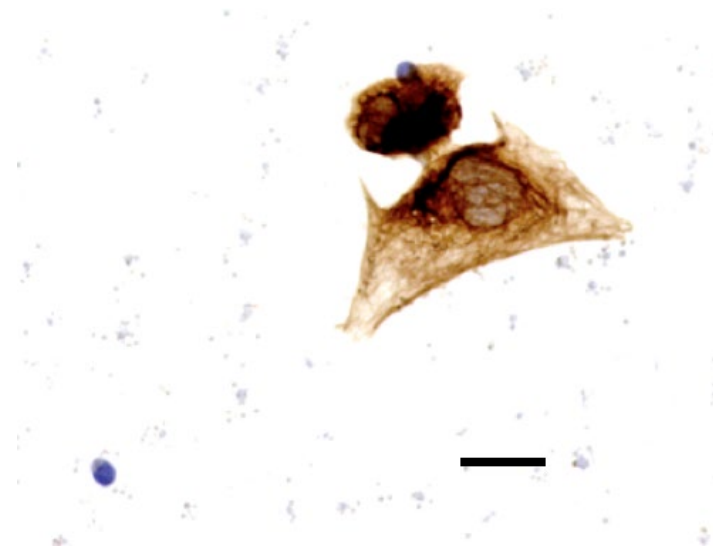

B

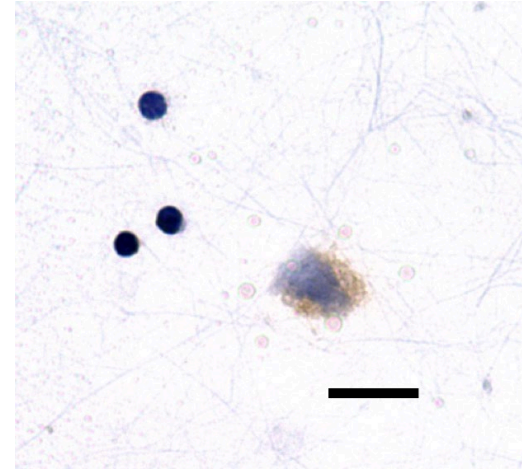

C

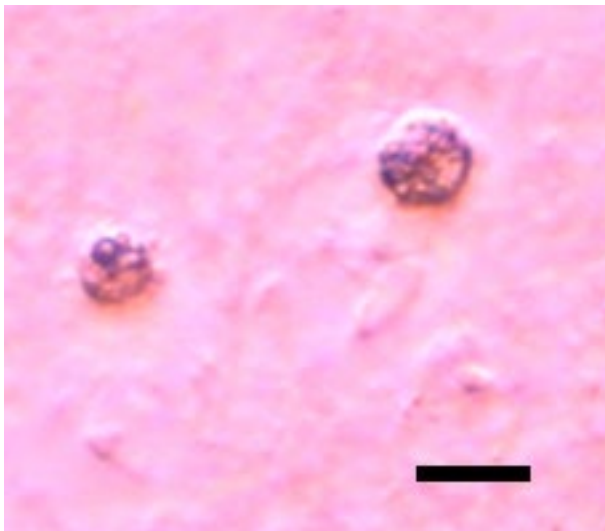

**Fig. S3. Examples of captured CTCs of hepatocellular carcinoma by PME A coating.**

(A) Spike test using Huh7 cell line.

(B) CTC from peripheral blood sample of a HCC patient.

Immunostaining was performed with anti- CK8/CK18 cocktail antibody.

(C) Spheroid-like structures appeared on day 5. Scale bars: 20  $\mu$ m.

day 2

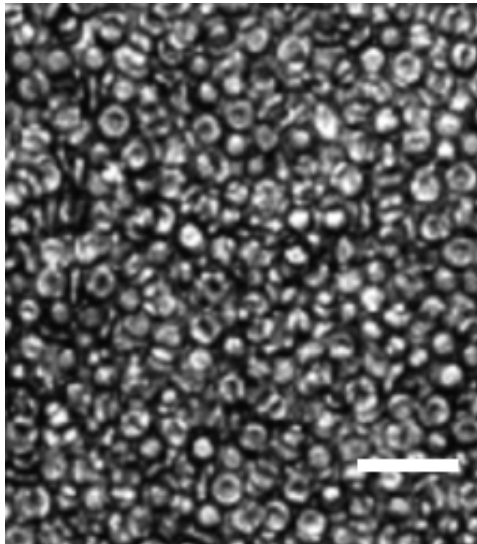

day 6

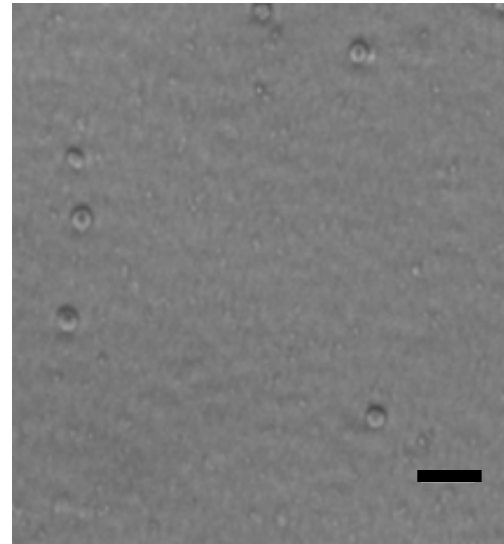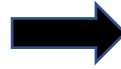

**Fig. S4. A direct culture after concentration with the OncoQuick tube.** Numerous red blood cells and leukocytes occupied a chamber slide on day 2. On day 6, cells mostly disappeared.

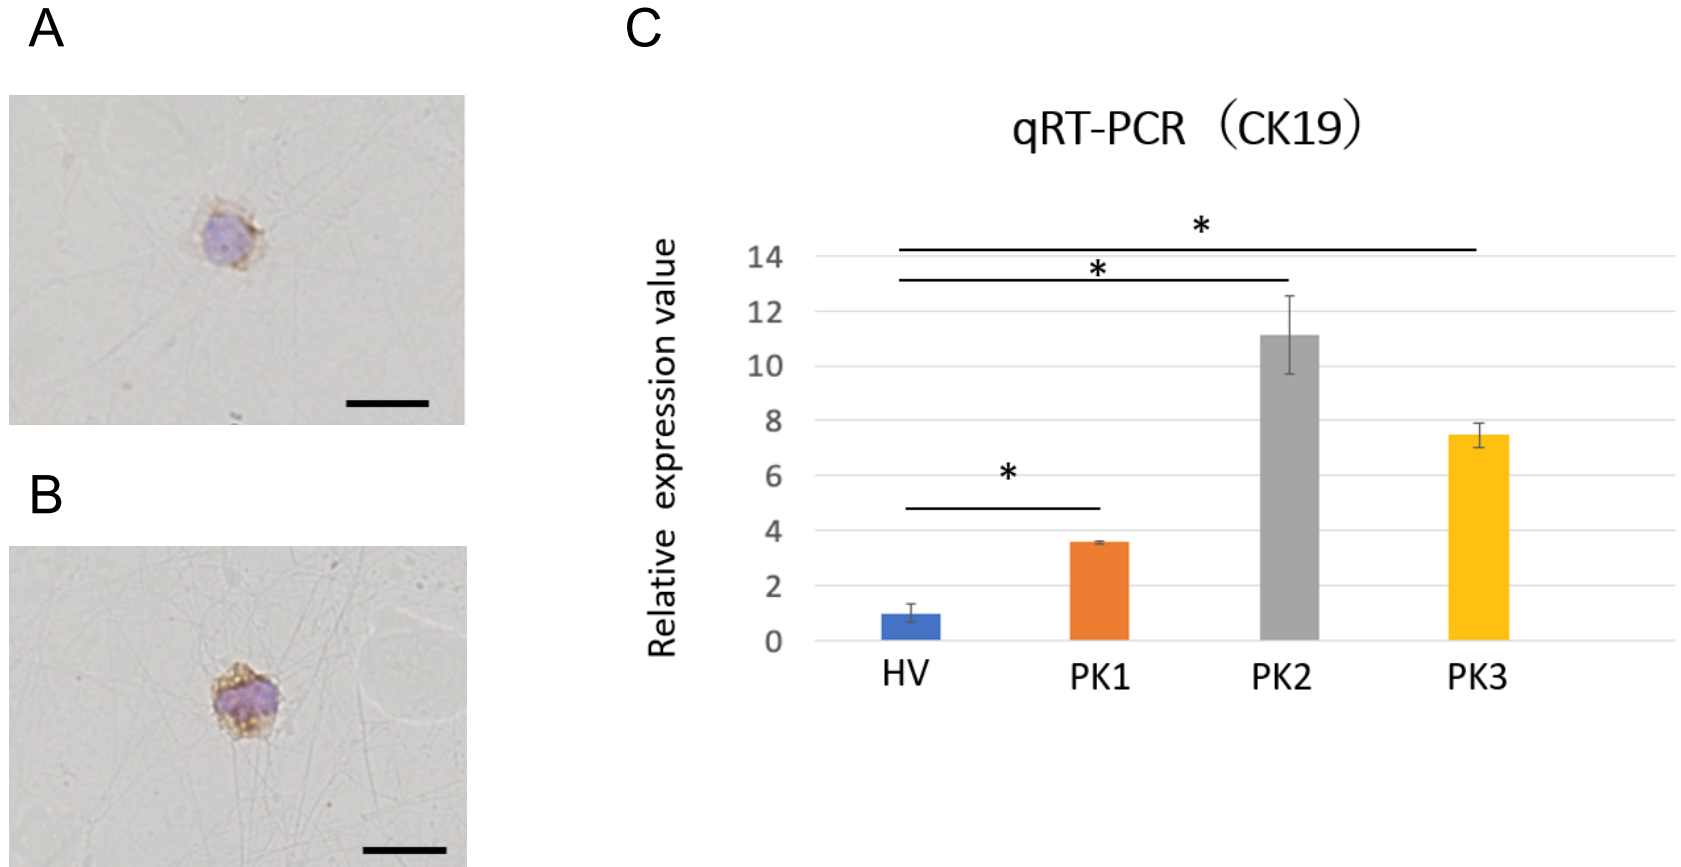

**Fig. S5. Examples of captured CTCs of pancreatic carcinoma by PMEA coating.**  
(A) A CTC from portal vein blood sample of a pancreatic cancer patient.  
(B) A CTC from portal vein blood sample of another pancreatic cancer patient.  
Immunostaining was performed with anti-CK19 antibody. Scale bars: 20  $\mu$ m.  
(C) qRT-PCR for CK19 mRNA expression. Cultured cells from three patients (PK1, PK2, PK3) were collected on day7. Blood sample from a healthy volunteer (HV) served as negative control. \* $P < 0.05$ .

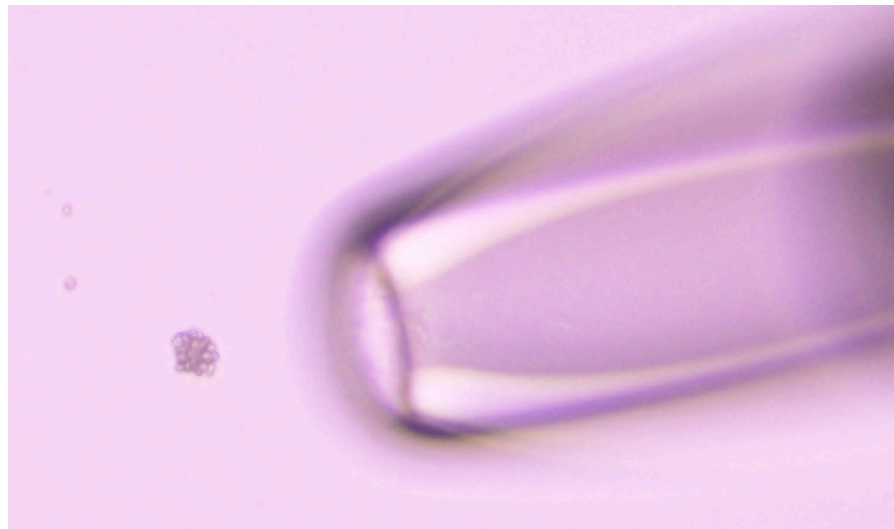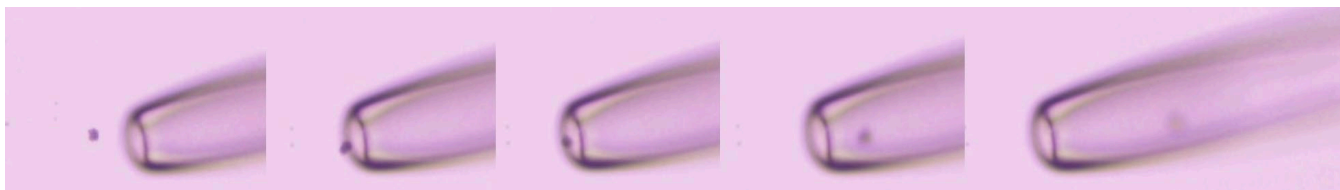

**Fig. S6. The electrically-powered micromanipulator can pick up a cluster of tumor cells.**

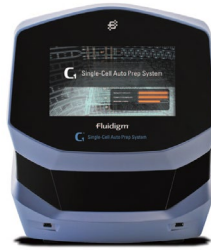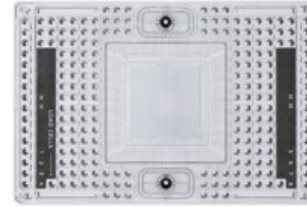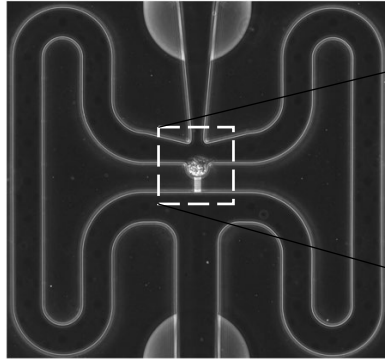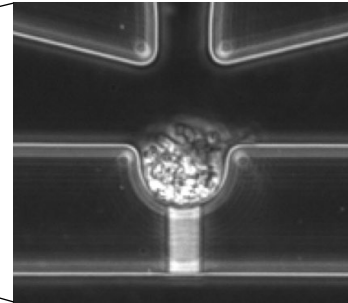

CTC culture  
on day 7

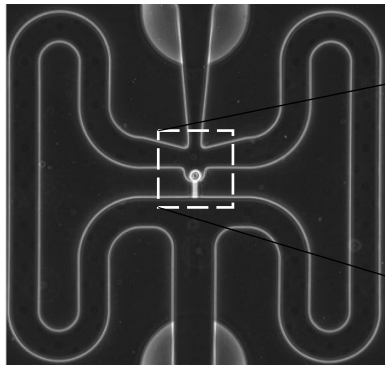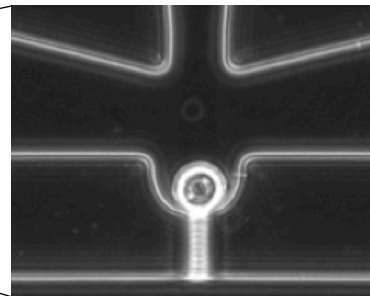

RBC

**Fig. S7. Comprehensive gene expression analysis using C1™ single cell Auto Prep System (Fluidigm).** A spheroid derived from CTC of a pancreatic cancer patient was captured in a cell deposit space on day 7. A red blood cell (8  $\mu\text{m}$  in diameter) was also captured.

Table S1. Recovery rate of CRC cells from blood sample

HT29

| Initial cell number/10 $\mu$ L | After OncoQuick concentration |          | ICC (+) | Recovery rate      |
|--------------------------------|-------------------------------|----------|---------|--------------------|
| 148                            | 132<br>(89.2%)                | Sample 1 | 98      | 74.2%<br>(98/148)  |
|                                |                               | Sample 2 | 103     | 78.0%<br>(103/148) |

DLD-1

| Initial cell number/10 $\mu$ L | After OncoQuick concentration |          | ICC (+) | Recovery rate     |
|--------------------------------|-------------------------------|----------|---------|-------------------|
| 121                            | 110<br>(90.9%)                | Sample 1 | 87      | 79.1%<br>(87/121) |
|                                |                               | Sample 2 | 83      | 75.5%<br>(83/121) |

ICC: Immunocytochemistry



Table S2. Relationship between detection of circulating tumor cells and clinicopathological parameters

|                                        | N = 41            | CTC (+), N = 18   | CTC (-), N = 23 | P value |
|----------------------------------------|-------------------|-------------------|-----------------|---------|
| Age: years; median (range)             | 67 (25-80)        | 68.5 (40-80)      | 67 (25-80)      | 0.73    |
| Sex: Male /Female                      | 26/15             | 13/5              | 13/10           | 0.30    |
| CEA ng/mL; median (range))             | 30 (2-2739)       | 13.75 (2-2739)    | 50 (2-1956)     | 0.89    |
| CA19-9 U/mL; median (range))           | 26.2 (0.4-4349.5) | 17.5 (0.4-2870.2) | 36 (0.4-4339.5) | 0.61    |
| Location: Right / Left                 | 8/33              | 4/14              | 4/19            | 0.70    |
| *Differentiation : tub / muc, por      | 31/3              | 12/3              | 19/0            | 0.02    |
| Primary tumor resection :<br>yes / no  | 30/11             | 12/6              | 18/5            | 0.41    |
| Chemotherapy or radiation :<br>yes /no | 11/30             | 3/15              | 8/15            | 0.19    |

\* tub: tubular adenocarcinoma, muc: mucinous carcinoma,  
por: poorly differentiated adenocarcinoma

**Table S3. Relationship between presence of growing tumor cells in cell culture and clinicopathological parameters**

|                                         | <b>N = 33</b>     | <b>Culture (+)<br/>N = 18</b> | <b>Culture (-)<br/>N = 15</b> | <b>P<br/>value</b> |
|-----------------------------------------|-------------------|-------------------------------|-------------------------------|--------------------|
| Age: years; median (range)              | 70 (25-80)        | 70 (25-80)                    | 69 (43-80)                    | 0.52               |
| Sex: Male / Female                      | 20/13             | 12/6                          | 8/7                           | 0.44               |
| CEA ng/mL; median (range))              | 30 (2-2739)       | 23.55 (2-1956)                | 30 (2-2739)                   | 0.96               |
| CA19-9 U/mL; median (range))            | 26.2 (0.4-4349.5) | 22.6 (0.4-1691.8)             | 28.6 (0.4-4339.5)             | 0.43               |
| Location: Right / Left                  | 8/25              | 3/15                          | 5/10                          | 0.27               |
| *Differentiation : tub / muc, por       | 26/2              | 15/2                          | 11/0                          | 0.15               |
| Primary tumor resection :<br>yes / no   | 25/8              | 14/4                          | 11/4                          | 0.77               |
| Chemotherapy or radiation :<br>yes / no | 10/23             | 1/17                          | 9/6                           | 0.0004             |

\* tub: tubular adenocarcinoma, muc: mucinous carcinoma,  
por: poorly differentiated adenocarcinoma
